# 1 Mitotic replisome disassembly in vertebrates

2

3 Sara Priego Moreno<sup>1,2</sup>, Rebecca M. Jones<sup>1</sup>, Divyasree Poovathumkadavil<sup>1</sup>, Agnieszka  
4 Gambus<sup>1</sup>

5

6 1. Institute for Cancer and Genomic Sciences, College of medical and Dental Sciences,  
7 University of Birmingham, Edgbaston, Birmingham, B15 2TT, UK

8 2. Present address: Salk Institute for Biological Studies, 10010 N Torrey Pines Rd, La  
9 Jolla, California 92037

10

## 11 **ABSTRACT**

12

13 Recent years have brought a breakthrough in our understanding of the process of  
14 eukaryotic DNA replication termination. We have shown that the process of replication  
15 machinery (replisome) disassembly at the termination of DNA replication forks in S-phase of  
16 the cell cycle is driven through polyubiquitylation of one of the replicative helicase subunits  
17 Mcm7. Our previous work in *C.elegans* embryos suggested also an existence of a back-up  
18 pathway of replisome disassembly in mitosis. Here we show, that in *Xenopus laevis* egg  
19 extract, any replisome retained on chromatin after S-phase is indeed removed from  
20 chromatin in mitosis. This mitotic disassembly pathway depends on formation of K6 and K63  
21 ubiquitin chains on Mcm7 by TRAIPI ubiquitin ligase and activity of p97/VCP protein  
22 segregase. The mitotic replisome pathway is therefore conserved through evolution in higher  
23 eukaryotes. However, unlike in lower eukaryotes it does not require SUMO modifications.  
24 This process can also remove any helicases from chromatin, including “active” stalled ones,  
25 indicating a much wider application of this pathway than just a “back-up” for terminated  
26 helicases.

27

28

## 29 **INTRODUCTION**

30

31 Faithful cell division is the basis for the propagation of life and requires accurate  
32 duplication of all genetic information. DNA replication must be precisely regulated as  
33 unrepaired mistakes can change cell behaviour with potentially severe consequences, such  
34 as genetic disease, cancer and premature ageing (Burrell, McClelland et al., 2013).  
35 Fundamental studies have led to a step-change in our understanding of the initiation of DNA  
36 replication and DNA synthesis, but until discovery of the first elements of the eukaryotic

1 replisome disassembly mechanism in 2014, the termination stage of eukaryotic replication  
2 was mostly unexplored.

3 DNA replication initiates from thousands of replication origins. They are the positions  
4 within the genome where replicative helicases become activated and start unwinding DNA  
5 while moving in opposite directions, away from each other, creating two DNA replication  
6 forks. The replicative helicase is composed of Cdc45, Mcm2-7 hexamer and GINS complex  
7 (CMG complex) (Moyer, Lewis et al., 2006); it is positioned at the tip of replication forks and  
8 forms a platform for replisome assembly (Replisome Progression Complex, RPC) (Gambus,  
9 Jones et al., 2006). Once established, the replication forks replicate chromatin until they  
10 encounter forks coming in opposite directions from neighboring origins. At this point the  
11 termination of replication forks takes place. As CMG helicases travel on the leading strand  
12 templates at the forks, the strand encircled by converging helicases differs due to the  
13 antiparallel nature of the DNA molecule (Fu, Yardimci et al., 2011). The two converging  
14 helicases can therefore pass each other allowing for completion of DNA synthesis. Finally,  
15 removal of the replisome from fully duplicated DNA is the last stage of forks termination  
16 (Dewar, Budzowska et al., 2015). We have shown that in *Xenopus laevis* egg extract and in  
17 *C. elegans* embryos this replisome removal in S-phase is driven by Cul2<sup>LRR1</sup> ubiquitin ligase,  
18 which ubiquitylates Mcm7 within the terminated CMG complex (Sonneville, Moreno et al.,  
19 2017). Such modified CMG is then recognized by p97 (VCP) segregase and removed from  
20 chromatin allowing for disassembly of the whole replisome built around the helicase  
21 (Moreno, Bailey et al., 2014).

22 Interestingly, we have shown that in *C. elegans* embryos, any helicase complexes that fail  
23 to be unloaded in S-phase are alternatively unloaded in prophase of mitosis (Sonneville et  
24 al., 2017). This potential back-up mechanism functions when CUL-2<sup>LRR-1</sup> activity is blocked  
25 and, like the S-phase pathway, depends on the p97 segregase for unloading. Unlike the S-  
26 phase pathway, however, it requires an additional p97 cofactor UBXN-3/FAF1 and the  
27 SUMO-protease ULP-4 (Senp6/7 homologue in higher eukaryotes) (Sonneville et al., 2017).  
28 Interestingly, budding yeast do not possess this mitotic replisome disassembly pathway;  
29 cells lacking SCF<sup>Dia2</sup> activity, the ubiquitin ligase responsible for Mcm7 ubiquitylation in *S.*  
30 *cerevisiae*, accumulate post-termination replisomes on DNA until the next G1 of the next cell  
31 cycle (Maric, Maculins et al., 2014). Our aim therefore was to determine if this mitotic  
32 replisome disassembly pathway has been conserved throughout evolution and is functioning  
33 in higher eukaryotes, or if it is a phenomenon specific to *C. elegans* embryos. Here we show  
34 that a mitotic disassembly pathway does exist in vertebrates and determine the first  
35 elements of its regulation. We show that only a restricted part of the replisome stays retained  
36 on chromatin throughout mitosis in *Xenopus* egg extract. The disassembly of this replisome  
37 is independent of cullin type ubiquitin ligases but requires p97 segregase function. Mitotic

1 replisome disassembly depends on K6 and K63 ubiquitin chains but not SUMO  
2 modifications. We also identify TRAIP ubiquitin ligase as essential for Mcm7 ubiquitylation in  
3 mitosis. Finally, we show that active forms of helicase can also be unloaded in this way,  
4 suggesting that rather than being a back-up pathway for the disassembly of terminated  
5 replisomes, this process is essential to remove any replisome from chromatin before cell  
6 division.

7

## 8 **RESULTS**

9 *Xenopus* egg extract is a cell-free system, which has proven to be instrumental over the  
10 years in studies of DNA replication. To determine the existence of a mitotic replisome  
11 disassembly pathway in *Xenopus* egg extract we needed to allow our extract to progress  
12 from interphase into mitosis. Routinely we block this cell cycle transition by inhibition of  
13 cyclin synthesis in the extract through supplementation with cycloheximide, since it allows  
14 for better synchronization of the replication reaction (Gillespie, Gambus et al., 2012). To  
15 allow the extract to progress into mitosis we need therefore to supplement it with cyclins –  
16 either by addition of mitotic extract or addition of recombinant cyclin. We purified His-tagged  
17 *Xenopus laevis* Cyclin A1 NΔ56 (hereafter: Cyclin A1Δ) and added it to the extract upon  
18 completion of DNA replication, as described previously, to induce mitotic entry (EV Fig 1A)  
19 (Strausfeld, Howell et al., 1996). Upon addition of Cyclin A1Δ we could see condensation of  
20 chromatin into chromosomes – a clear sign of mitosis (EV Fig 1B).

21 To test if the replisome retained on chromatin in S-phase can be unloaded as cells enter  
22 mitosis we followed the experimental path detailed in Fig 1A. A replication reaction was set  
23 up in the interphase extract supplemented with Cullin ligase inhibitor MLN4924 to block  
24 Cul2<sup>LRR1</sup> activity and the S-phase replisome unloading (Sonneville et al., 2017). After  
25 completion of replication (90 min, EV Fig 1A) we optionally added Cyclin A1Δ, isolated  
26 chromatin at different time points during mitosis progression and analysed chromatin bound  
27 proteins by western blotting (Fig 1B). In the late S-phase samples (buffer control), the CMG  
28 helicase (represented by Cdc45 subunit) remained associated with chromatin and Mcm7  
29 displayed low levels of ubiquitylation, as seen before upon MLN4924 treatment and Cul2  
30 immunodepletion (Moreno et al., 2014, Sonneville et al., 2017), however upon addition of  
31 Cyclin A1Δ, Cdc45 and ubiquitylated Mcm7 were efficiently unloaded. This result indicates  
32 that indeed the mitotic replisome disassembly pathway is evolutionarily conserved and exists  
33 in vertebrates and that, unlike the S-phase pathway, it does not require activity of Cullin type  
34 ubiquitin ligases because the Cullin inhibitor was present throughout the reaction (Fig 1B).

35 Next, we tested whether the mitotic replisome disassembly pathway required the activity  
36 of the p97 segregase. We followed the experimental setup as before but now optionally  
37 added the inhibitor of p97, NMS873. The retained replisome was unloaded upon Cyclin A1Δ

1 addition in the absence but not in the presence of the p97 inhibitor indicating that indeed p97  
2 does play an essential role in promoting mitotic replisome disassembly (Fig 1C). We could  
3 also see an analogous result if the p97 inhibitor was present throughout the two stages of  
4 the cell cycle as the only way to block replisome disassembly (EV Fig 1C).

5 Interestingly, when the mitotic unloading of replisome was blocked with p97 inhibitor, we  
6 could clearly see accumulation of highly modified forms of Mcm7 on chromatin (Fig 1C and  
7 EV Fig 1C). To examine whether these modifications were due to further ubiquitylation of  
8 Mcm7, we blocked S-phase and mitotic replisome disassembly by addition of p97 inhibitor  
9 from the beginning of the replication reaction, induced mitosis after completion of DNA  
10 synthesis and optionally supplemented extract with a high concentration of wild-type (wt)  
11 ubiquitin or a chain-terminating mutant of ubiquitin with all lysines mutated (UbiNOK).  
12 Supplementation of mitotic extract with wt ubiquitin allowed for accumulation of highly  
13 modified Mcm7 on chromatin in mitosis as before (Fig 1D, left). However, addition of  
14 UbiNOK blocked further modifications of Mcm7, leaving only the chains which were built  
15 previously in S-phase (Fig1D, right). To determine whether this further Mcm7  
16 polyubiquitylation in mitosis was essential for mitotic replisome disassembly we repeated the  
17 experiment with addition of wt Ubi or UbiNOK but this time only in the presence of the Cullin  
18 inhibitor from the start of the reaction (Fig 1E). Addition of UbiNOK to mitotic extract blocked  
19 disassembly of the replisome (as shown by permanent Cdc45 chromatin binding) suggesting  
20 that further Mcm7 polyubiquitylation is required for its unloading. We could also observe that  
21 LRR1 (the substrate specific subunit of Cullin 2, targeting Mcm7 in S-phase) dissociates  
22 from chromatin in mitosis irrespectively of replisome disassembly, in agreement with the  
23 finding that it does not play an essential role in this pathway (Fig 1D and E) .

24 As the ubiquitin ligase acting in the mitotic pathway differed from that of the S-phase  
25 pathway, we decided to test whether the type of ubiquitin chains built on Mcm7 in mitosis  
26 also differed. To determine which ubiquitin chains were required for the mitotic Mcm7  
27 ubiquitylation and replisome disassembly, we supplemented extract with Cullin inhibitor,  
28 allowed completion of DNA synthesis and subsequently induced mitosis along with addition  
29 of a series of ubiquitin mutants that have only one lysine left in their sequence (Fig 1G). We  
30 observed that only wt ubiquitin and ubiquitin containing lysine 6 (K6) or lysine 63 (K63) could  
31 support mitotic replisome disassembly (as visualised by absence of Cdc45 on chromatin at  
32 75 min after inducing mitosis) (Fig 1G). Interestingly, chains linked through lysine 48 (K48),  
33 which are responsible for S-phase unloading (Moreno et al., 2014), could still be attached to  
34 Mcm7 in mitosis (upshift of modified Mcm7 forms) but they could not support unloading of  
35 the replisome as Cdc45 remained associated with chromatin. In a reciprocal experiment, we  
36 used a series of ubiquitin mutants with only one of the lysines within ubiquitin mutated (Fig  
37 1H). All of the mutants used, apart from the UbiNOK control mutant, supported disassembly



1 of the replisome, suggesting that either K6 or K63 can fulfill the mitotic pathway  
2 requirements (Fig 1H).

3 Having established that the type of ubiquitin chains and the type of ubiquitin ligase used  
4 by the mitotic pathway were different to those used by the S-phase pathway, our aim was to  
5 determine which ligase is driving this mitotic disassembly pathway. To identify the potential  
6 ligase we decided to immunoprecipitate the replisome retained on mitotic chromatin and  
7 analyse all the interacting proteins by mass spectrometry. We set up a replication reaction in  
8 the presence of caffeine and the p97 inhibitor and induced mitosis upon completion of DNA  
9 synthesis. We immunoprecipitated Mcm3 from mitotic chromatin and analysed interacting  
10 factors by mass spectrometry. Firstly, we determined which components of the replisome  
11 are still retained on chromatin in mitosis. For this we compared the replisome components  
12 retained on chromatin in mitosis with the S-phase post-termination replisome, reported  
13 previously (Sonneville et al., 2017) (Fig 2A and B). Interestingly, while inhibition of replisome  
14 disassembly in S-phase led to accumulation of the whole replisome on chromatin  
15 (Sonneville et al., 2017), only a selection of replisome components stayed on chromatin in  
16 mitosis. All of the lagging strand components of the replisome were lost, as were Mcm10  
17 and Claspin, while levels of Ctf4/And-1, Timeless/Tipin and Pol epsilon were also reduced  
18 (Fig 2A and B). This suggests that only components directly interacting with the CMG  
19 accumulated around it through to mitosis, while others, more peripheral to CMG could  
20 dissociate over time.

21 The level of histone chaperone FACT (Spt16 and SSRP) stays the same between S-  
22 phase and mitosis. This suggests that the retained replisome has the potential ability to  
23 move through chromatin as FACT is likely to displace nucleosomes in front of such a  
24 replisome. We could see also that Cul2<sup>LRR1</sup>, which strongly accumulated in the S-phase  
25 post-termination replisome, is not a major component of the mitotic replisome, as expected  
26 from previous data (Fig 1).

27 Finally, we detected two other ubiquitin ligases interacting with the mitotic helicase:  
28 TRAIIP and RNF213. More specifically, we found that TRAIIP interacts with the post-  
29 termination replisome in S-phase but it is enriched in mitosis, while RNF213 is a minor  
30 interactor of only the mitotic replisome (Fig 2A). The TNF-receptor-associated factor (TRAF)-  
31 interacting protein (TRAIIP, also known as TRIP or RNF206) was originally identified through  
32 its ability to bind TRAF1 and TRAF2 and shown to inhibit NFκB activation (Lee, Lee et al.,  
33 1997). It has been since shown that TRAIIP is an E3 ubiquitin ligase, which is essential for  
34 cell proliferation (Besse, Campos et al., 2007, Park, Choi et al., 2007), and which is required  
35 for resolution of replication stress (Feng, Guo et al., 2016, Harley, Murina et al., 2016,  
36 Hoffmann, Smedegaard et al., 2016) and for regulation of the spindle assembly checkpoint  
37 during mitosis (Chapard, Meraldi et al., 2014). TRAIIP is ubiquitously expressed, with its

1 expression regulated by E2F transcription factors and protein stability controlled by the  
2 ubiquitin proteasome pathway – as a result, the protein level of TRAIP peaks in the G2/M  
3 stage of the cell cycle (Chapard, Hohl et al., 2015). On the other hand, RNF213 (mysterin) is  
4 a large (591kD) ATPase/E3 ligase, which is mostly known as being a susceptibility gene for  
5 Moyamoya disease (MMD) (cerebrovascular disease) (Kamada, Aoki et al., 2011, Liu,  
6 Morito et al., 2011). Of note, *RNF213*<sup>-/-</sup> mice do not show any apparent health problems  
7 (Kobayashi, Yamazaki et al., 2013, Sonobe, Fujimura et al., 2014) and more recently  
8 RNF213 was shown to globally regulate ( $\alpha$ -ketoglutarate)-dependent dioxygenases ( $\alpha$ -  
9 KGDDs) and non-mitochondrial oxygen consumption (NMOC) (Banh, Iorio et al., 2016). To  
10 support our mass spectrometry data, we have tested a number of antibodies by western  
11 blotting against RNF213 and TRAIP to confirm their association with the chromatin bound  
12 replisome in mitosis. Whilst we were unsuccessful with detection of any signal for RNF213,  
13 we were able to show that TRAIP interacts with replisome retained on chromatin in mitosis  
14 (Fig 2C and EV Fig1D).

15 As we confirmed that TRAIP is a likely candidate for the ubiquitin ligase ubiquitylating  
16 Mcm7 and leading to disassembly of the replisome retained in mitosis, we next  
17 characterized TRAIP chromatin binding dynamics during the two cell cycle stages and the  
18 replisome disassembly process. TRAIP associated weakly with S-phase chromatin at times  
19 when forks are moving through chromatin replicating DNA. However, it accumulated strongly  
20 on chromatin in S-phase upon inhibition of replisome disassembly with the p97 inhibitor (Fig  
21 3A). Importantly, TRAIP also accumulated on mitotic chromatin when replisome disassembly  
22 was inhibited with the p97 inhibitor, following the same pattern as replisome components  
23 (Fig 3 B). To test whether TRAIP is the ubiquitin ligase ubiquitylating Mcm7 in mitosis, we  
24 purified recombinant GST-tagged *X.laevis* TRAIP, both wild type and C25A RING domain  
25 mutant, which been shown to disrupt TRAIP ubiquitin ligase activity (Besse et al., 2007,  
26 Chapard et al., 2014). We blocked the disassembly of the replisome in S-phase by inhibition  
27 of cullins with MLN4924, and drove extract into mitosis by addition of Cyclin A1 $\Delta$ , when we  
28 added recombinant wt or mutant TRAIP. To be able to clearly see ubiquitylation of Mcm7 in  
29 mitosis we supplemented the mitotic extract also with p97 inhibitor NMS873 to inhibit  
30 unloading of ubiquitylated Mcm7. Figure 3C shows that addition of RING mutant of TRAIP,  
31 but not wild type TRAIP, inhibits mitotic ubiquitylation of Mcm7 as the size of ubiquitylated  
32 forms of Mcm7 remains very close to ones build on Mcm7 already in S-phase (15 min  
33 timepoint). This suggest that the recombinant mutant TRAIP successfully competed with  
34 endogenous TRAIP protein and that ubiquitin ligase activity of TRAIP is needed for mitotic  
35 Mcm7 ubiquitylation.

36 To fully understand the requirement for ubiquitin like modifications during the mitotic  
37 replisome disassembly in vertebrates, we aimed to establish whether SUMOylation plays

1 any role in this process as ULP-4 is essential for mitotic helicase disassembly in *C. elegans*  
2 embryos. To this end we decided to inhibit or stimulate SUMOylation during mitosis and  
3 assess its effect on replisome disassembly. Firstly, we observed that late S-phase chromatin  
4 is full of SUMOylated factors and that levels of these proteins go down over time upon entry  
5 into mitosis (Fig 4 and EV Fig 2). To inhibit SUMOylation we have supplemented the mitotic  
6 extract with the recombinant active domain of SENP1 which acts as a potent non-specific  
7 deSUMOylating enzyme. Addition of SENP1 wipes out all the SUMO2ylation (Fig 4A) and  
8 SUMO1ylation (EV Fig 3A) but the disassembly of the mitotic replisome is not affected (Fig  
9 4A). We have also stimulated SUMOylation through addition of a high concentration of  
10 recombinant SUMO1 or SUMO2 (EV Fig 2). In both cases, despite a clear increase of  
11 SUMO signal on chromatin, the unloading of the mitotic replisome was not affected. Finally  
12 we have also blocked de-SUMOylation with SUMO2-VS, a derivative of SUMO2 which binds  
13 to the active site of SENPs and blocks their activity. Again, we could observe strong  
14 accumulation of SUMO2ylated products in the extract and on chromatin without affecting  
15 mitotic replisome disassembly. Interestingly, despite inhibition of de-SUMOylating enzymes,  
16 most of the SUMO signal is still disappearing from chromatin during progression of mitosis,  
17 indicating that the SUMOylated proteins are unloaded from chromatin throughout mitosis  
18 rather than being de-SUMOylated. In conclusion, we determined that SUMO modifications  
19 do not play an essential role in the mitotic disassembly pathway in *Xenopus* egg extract. In  
20 an analogous way we have also shown that they do not play a role during the S-phase  
21 replisome disassembly pathway (EV Fig 3).

22 Finally, we set out to determine whether the mitotic replisome disassembly pathway we  
23 were characterising was a mere “back-up” pathway for replisomes that terminated in S-  
24 phase but failed to be unloaded, or if it can have a more generic usage to remove any  
25 replication machinery still remaining on chromatin until mitosis. To test such a possibility, we  
26 blocked active (stalled) replisomes on chromatin by addition of polymerase inhibitor  
27 aphidicolin to the egg extract during DNA replication reaction. To accumulate such  
28 replisomes in large numbers, we also supplemented the extract with caffeine so as to block  
29 checkpoint activation and fire origins uncontrollably. Upon accumulation of such blocked  
30 replisomes we supplemented the reaction optionally with Cyclin A1 $\Delta$  at 90 min to induce  
31 mitotic entry (Fig 5A). Interestingly, active replisomes remained associated with chromatin  
32 throughout the experiment in late S-phase (buffer control), with no indication of Mcm7  
33 ubiquitylation as expected. Upon addition of cyclin A1 $\Delta$  however, Mcm7 becomes  
34 ubiquitylated and replisomes are unloaded (Cyclin A1 $\Delta$ ). We can observe however, a  
35 noticeable delay of both these processes compared with terminated replisomes (compare  
36 Fig 5A with Fig 1B). Such a delay is likely due to the fact that with no prior ubiquitylation of  
37 Mcm7 in S-phase, it takes longer for ubiquitin chains to be built in mitosis. We have also

1 determined that unloading of stalled replisomes requires the activity of p97 segregase, as it  
2 is inhibited with p97 inhibitor NMS873 (Fig 5B). From these observations we can thus say  
3 that neither prior modification of Mcm7 in S-phase nor the “terminated” conformation of the  
4 helicase are essential for mitotic modification of Mcm7 and replisome disassembly.

5  
6  
7

## 8 **DISCUSSION**

9 We have presented here the existence of a mitotic pathway of replisome disassembly in  
10 vertebrates. One immediate question is why would the cells need a mitotic pathway of  
11 replisome disassembly? Traditionally, it is perceived that all the DNA metabolism should be  
12 finished before cells enter mitosis. According to this model, G2 phase of the cell cycle is  
13 there to ensure that all DNA replication and damage repair are completed prior to  
14 chromosome condensation and separation during mitosis. The last decade provided,  
15 however, much evidence that this is not the case: unreplicated DNA is detected in many  
16 human cells in mitosis; DNA synthesis can proceed during mitosis (mitotic DNA synthesis –  
17 MiDAS); underreplicated DNA can lead to the formation of ultrafine bridges (UFB) in  
18 anaphase and, finally, formation of structures in G1 stage of the next cell cycle that are  
19 bound by 53BP1 protein (53BP1 bodies) (Liu, Nielsen et al., 2014, Minocherhomji, Ying et  
20 al., 2015, Moreno, Carrington et al., 2016). Genomewide, such unreplicated regions  
21 correlate with common fragile sites (CFS), which are chromosomal loci responsible for the  
22 majority of the rearrangements found in cancer cells (Bhowmick & Hickson, 2017). These  
23 unreplicated fragments of DNA result from replication forks not finishing replication and such  
24 forks, with their associated replisomes, are subsequently retained on chromatin into mitosis.  
25 It is likely that these unreplicated DNA fragments must be processed in mitosis to ensure  
26 correct chromosome segregation and this processing will involve replisome unloading and  
27 fork remodelling – hence the need for a process of replisome disassembly in mitosis.

28 TRAIP is a pleiotropic ubiquitin ligase involved in numerous cellular processes. It is clear  
29 that TRAIP is essential for appropriate repair of DNA damage in many forms: mitomycin C  
30 (MMC) induced inter-strand crosslinks (ICLs); damage caused by treatments with  
31 camptothecin (CPT) (Hoffmann et al., 2016), UV (Harley et al., 2016) and hydroxyurea (HU)  
32 (Feng et al., 2016); as well as for translesion DNA synthesis (Wallace, Merkle et al., 2014).  
33 TRAIP has also been reported to be an important regulator of the spindle assembly  
34 checkpoint and regulates mitotic progression. Cells with downregulated TRAIP go through  
35 mitosis faster and with more chromosome segregation errors (Chapard et al., 2014, Park, Jo  
36 et al., 2015). For most of these processes the ubiquitin ligase activity of TRAIP is essential,  
37 but the substrate(s) modified by TRAIP is not known.

1 In support of our observation that TRAIIP interacts weakly with S-phase chromatin when  
2 replication forks replicate DNA (Fig 3A), TRAIIP has been shown to interact with nascent  
3 DNA in unperturbed S-phase in human cells through Nascent Chromatin Capture (NCC)  
4 (Hoffmann et al., 2016) but TRAIIP knockdown does not affect much replication progression  
5 and overall DNA synthesis rates (Harley et al., 2016, Hoffmann et al., 2016). Upon DNA  
6 damage TRAIIP re-localises from nucleoli to sites of damage in a manner dependent on a  
7 PCNA interacting box (PIP-box), present at the C-terminus of TRAIIP (Feng et al., 2016,  
8 Hoffmann et al., 2016). Loss of TRAIIP was suggested to interfere with the reconfiguration of  
9 stalled replication forks (Hoffmann et al., 2016), possibly through unloading of PCNA as  
10 further inhibition of proteasomal degradation in the absence of TRAIIP did not exacerbate the  
11 levels of HU-induced fork stalling. This suggested that degradation of a TRAIIP ubiquitylation  
12 substrate is not the cause of this phenotype (Feng et al., 2016, Hoffmann et al., 2016).  
13 Interestingly, cells expressing the  $\Delta$ RING mutant of TRAIIP as the only TRAIIP version, are as  
14 sensitive to MMC as TRAIIP knockdown cells, while  $\Delta$ PIP TRAIIP cells are only mildly  
15 sensitive. This indicates that even without PCNA interaction TRAIIP can still find its targets at  
16 the replication forks (Hoffmann et al., 2016). With the data presented here, identifying TRAIIP  
17 as the ubiquitin ligase needed for Mcm7 ubiquitylation during mitosis, it is interesting to  
18 speculate that TRAIIP can play an analogous role during DNA damage repair i.e. to stimulate  
19 replisome unloading and fork remodeling.

20 If TRAIIP interacts with replisome and post-termination replisome during normal S-phase  
21 (data presented here and (Hoffmann et al., 2016)) an important question emerges, which is  
22 how is it activated only in mitosis or only upon DNA damage? In human cells, the abundance  
23 of TRAIIP protein is tightly regulated and peaks in G2/M stages of cell cycle (Chapard et al.,  
24 2015). Moreover, TRAIIP re-localizes from nucleoli to sites of DNA damage upon treatment,  
25 but we do not know what is driving this change in location. In early mitosis TRAIIP is  
26 localized all over nucleus but binds exclusively to chromosomes in anaphase (Chapard et  
27 al., 2014). The abundance, localization and activity of TRAIIP are therefore very carefully  
28 regulated in the cell. The intricacy and importance of this regulation may stem from the fact  
29 that uncontrolled unloading of the replisome would have a big impact on cell viability and is  
30 supported by observations whereby even moderate levels of TRAIIP overexpression were  
31 reported to be cytotoxic, while epitope tagging of TRAIIP (especially at the N-terminus)  
32 affects its functionality (Hoffmann et al., 2016).

33 Our data is consistent with a model in which TRAIIP drives mitotic replisome disassembly  
34 by promoting Mcm7 modification with K6 and K63 linked ubiquitin chains. Although there is  
35 no previous experimental evidence that TRAIIP can support such ubiquitin linkages *in vivo*,  
36 *in vitro* assays have shown that TRAIIP works well with conjugating enzymes (E2s)



1 Ubch5a,b,c (but not Ubch2, H3, H6, H7, or Ubcl3+Uev1A) (Besse et al., 2007).  
2 Interestingly, Ubch5a was shown to support formation of ubiquitin chains with no specific  
3 topology (Windheim, Peggie et al., 2008). It is plausible therefore that TRAIp/Ubch5 can  
4 effectively produce chains of different linkages to support mitotic replisome disassembly.

5 Upon Mcm7 ubiquitylation the replisome needs to be unloaded. In S-phase, K48 ubiquitin  
6 chains support replisome disassembly. In mitosis however, K48 chains are not functional  
7 and unloading is driven instead by K6 and K63 chains. We know that p97, in complex with  
8 Ufd1 and Npl4 cofactors, is responsible for unloading of the replisome in S-phase (Maric,  
9 Mukherjee et al., 2017, Moreno et al., 2014, Sonnevill et al., 2017). While p97 is well known  
10 for processing substrates ubiquitylated with K48 linked ubiquitin chains (Meyer, Bug et al.,  
11 2012), less is known about its contribution in processing other ubiquitin linkages.  
12 Interestingly, a recent study shows that upon inhibition of p97 activity, human cells  
13 accumulate K6, K11, K48 and, to a lesser extent, K63 ubiquitin chains (Heidelberger, Voigt  
14 et al., 2018). Moreover, out of five tested p97 cofactors, all were found to associate with K11  
15 chains, four with K48 chains, and three with K63 chains (Alexandru, Graumann et al., 2008).  
16 p97 cofactors are known also to interact with ubiquitin-like modifiers e.g. Nedd8 and Atg8  
17 (reviewed in (Meyer, 2012)). Finally, p97 was also shown to bind more readily to branched  
18 K11-K48 chains, than to K11 or K48 chains on their own (Meyer & Rape, 2014). These  
19 proteome-wide data imply that the role of p97 does indeed extend beyond recognition of  
20 K48-chain-modified substrates, though currently little is known about its interaction with K6  
21 chains.

22 Importantly, other p97 substrates have been identified, which are modified with non-K48  
23 chains e.g. in double strand break repair RNF8 multi-monoubiquitylates L3MBTL1, which is  
24 then extracted by p97 (Kato, Nakajima et al., 2014); in mitochondrial fusion, Mfn1 is  
25 ubiquitylated with K63 chains and processed by p97 (Mukherjee & Chakrabarti, 2016) and in  
26 antiviral signaling the interaction between p97 and the RIG-I sensor of viral DNA is  
27 stimulated by K63 ubiquitylation of RIG-I (Hao, Jiao et al., 2015). All in all, there is much  
28 more complexity to p97 function regulation than generally appreciated and future research  
29 will reveal how the fine tuning of replisome disassembly by p97 at different stages of the cell  
30 cycle or from different DNA structures is achieved.

31 Finally, we have shown that in the *Xenopus* system neither S-phase nor mitotic replisome  
32 disassembly requires SUMO modifications (Fig 4 and EV Fig 3) in contrast to *C. elegans*  
33 embryos where ULP-4 is required for mitotic unloading (Sonnevill et al., 2017). This  
34 requirement may be thus specific to worm embryos, require ULP-4 protein but not its  
35 enzymatic activity or regulate an indirect process that is not well recapitulated in the egg  
36 extract cell free system. It has been suggested recently that SUMOylation of TRAIp can



1 regulate its stability and ability to move to the nucleus (Park, Han et al., 2016), but this may  
2 not be present in the egg extract.

3 Perturbations in DNA replication initiation and elongation leading to genomic instability  
4 are well linked with genetic disorders and can drive cancer development. The disruption of  
5 replisome disassembly is, therefore, highly likely to be detrimental to human health too.  
6 While so far we have no solid data to support this claim, previous studies with TRAIP do  
7 suggest this to be the case: homozygous TRAIP knockdown mouse embryos die shortly  
8 after implantation due to proliferation defects (Park et al., 2007); mutations in human TRAIP  
9 lead to primordial dwarfism (Harley et al., 2016); overexpression of human TRAIP has been  
10 reported in basal cell carcinomas (Almeida, Ryser et al., 2011) and breast cancer (Yang,  
11 Trent et al., 2006, Zhou & Geahlen, 2009) and reduced nuclear expression of TRAIP was  
12 associated with human lung adenocarcinoma (Soo Lee, Jin Chung et al., 2016). The fact  
13 that cells have evolved multiple pathways to ensure timely replisome disassembly supports  
14 the notion of the vital importance of this process for cell biology and time will tell whether  
15 targeting Mcm7 and replisome disassembly in mitosis is the key mechanism leading to any  
16 of these disease phenotypes.

17  
18

## 19 **MATERIALS AND METHODS**

### 20 **Inhibitors**

21 Caffeine (C8960, Sigma) was dissolved in water at 100 mM and added to the extract along  
22 with demembrated sperm nuclei at 5 mM. MLN4924 (A01139, Active Biochem) was  
23 dissolved in DMSO at 20 mM and added to the extract 15 minutes after addition of sperm  
24 nuclei at 10  $\mu$ M. NMS873 (17674, Cayman Chemical Company) was dissolved in DMSO at  
25 10 mM and added to the extract 15 minutes after addition of sperm nuclei at 50  $\mu$ M.  
26 SUMO2-VS (UL-759) was purchased from Boston Biochem and used at 1  $\mu$ M in *Xenopus*  
27 *laevis* egg extract. Aphidicolin was dissolved in DMSO at 8 mM and added to the extract  
28 along with demembrated sperm nuclei at 40  $\mu$ M.

29

### 30 **Recombinant proteins**

31 Recombinant His-tagged ubiquitin and ubiquitin mutants were purchased from Boston  
32 Biochem, dissolved in LFB1/50 (40 mM Hepes/KOH pH 8.0, 20 mM potassium phosphate  
33 pH 8.0, 50 mM potassium chloride, 2 mM magnesium chloride, 1 mM EGTA; 10% sucrose  
34 w/v; 2 mM DTT; 1  $\mu$ g/ml aprotinin; 1  $\mu$ g/ml leupeptin; 1  $\mu$ g/ml pepstatin) buffer at 10 mg/ml  
35 and used at 0.5 mg/ml in *Xenopus laevis* egg extract.

1 pET28a-X.I. SUMO1 and pET28a-X.I. SUMO2 were purchased from GenScript.  
2 Recombinant His-tagged *Xenopus laevis* SUMO1 and SUMO2 were expressed in Rosetta  
3 (DE3) pLysS cells over night at 20°C after induction with 1 mM IPTG. Cells were lysed in  
4 lysis buffer: 50 mM Tris-HCl, 500 mM NaCl, 10 mM imidazole, 2 mM MgCl<sub>2</sub>, 0.1 mM PMSF,  
5 1µg/ml of each aprotinin, leupeptin and pepstatin, pH 7.5. Homogenates were supplemented  
6 with 25 U/ml benzonase and incubated at room temperature for 20 minutes. Homogenates  
7 were subsequently spun down at 14,000 g for 30 minutes at 4°C and supernatants  
8 incubated with 2 ml of pre-washed Super Ni-NTA Affinity Resin (SUPER-NINA100,  
9 Generon) for 2 hours with rotation at 4 °C. Resins were subsequently washed twice with 50  
10 mM Tris-HCl, 500 mM NaCl, 30 mM imidazole, 0.1 mM PMSF, 1µg/ml of each aprotinin,  
11 leupeptin and pepstatin, pH 7.5. Resin-bound proteins were finally eluted in 1 ml fractions  
12 with a solution containing 50 mM Tris-HCl, 150 mM NaCl, 200 mM imidazole, 5 mM β-  
13 mercaptoethanol, 0.1 mM PMSF, 1 µg/ml of each aprotinin, leupeptin and pepstatin, pH 7.5.  
14 Fractions containing the highest levels of recombinant SUMO1 or SUMO2 were dialysed into  
15 LFB1/50 buffer. Both SUMO1 and SUMO2 were used at 0.5 mg/ml in *Xenopus laevis* egg  
16 extract.

17 pET28a-pHISTEV30a-SEN1(415-649) was a kind gift from Ron Hay's laboratory.  
18 Recombinant active domain of human SEN1 (aa 415-647) was expressed and purified as  
19 explained above for recombinant SUMOs.

20 Recombinant His-tagged *Xenopus laevis* cyclin A1 NΔ56 (pET23a-X.I. cyclin A1 NΔ56) was  
21 a kind gift from Julian Blow's laboratory (Strausfeld et al., 1996), was expressed in Rosetta  
22 (DE3) pLysS cells over night at 15°C after induction with 1 mM IPTG, and subsequently  
23 purified as explained above for recombinant SUMOs but using different solutions. Lysis  
24 buffer: 50 mM Tris-HCl, 300 mM NaCl, 2 mM MgCl<sub>2</sub>, 1 mM DTT, 0.1 mM PMSF, 1 µg/ml of  
25 each aprotinin, leupeptin and pepstatin, pH 7.4. Washes: Resin was washed twice with lysis  
26 buffer on its own and twice again with lysis buffer supplemented with 0.1% Triton X-100.  
27 Elution buffer: Lysis buffer supplemented with 10% glycerol and 250 mM imidazole.

28 *Xenopus* TRAIIP was cloned into pGS21 vector, expressed in BL21 (DE3) bacterial strain in  
29 autoinduced AIM media O/N at 18°C. Pellets were lysed in lysis buffer: 50mM NaH<sub>2</sub>PO<sub>4</sub>; pH  
30 9, 300mM NaCl, 10% glycerol, 2mM DTT, 2mM MgCl<sub>2</sub>, 0.05% Brij, 0.1 mM PMSF, 1 µg/ml of  
31 each aprotinin, leupeptin and pepstatin, 1 mg/ml lysozyme, 25 U/ml Benzonase. The protein  
32 was purified as above but using Glutathione Sepharose 4B (GE Healthcare) and eluted with  
33 25 mM glutathione. The protein was then dialysed into LFB1/50 buffer (as above) and  
34 concentrated up to 0.3 mg/ml of full length GST-TRAIIP. It was used in the egg extract at final  
35 concentration of 30 µg/ml. pGS21-TRAIIP(C25A) was generated by site directed mutagenesis  
36 and purified in analogous way.

1  
2  
3  
4  
5  
6  
7  
8  
9  
10  
11  
12  
13  
14  
15  
16  
17  
18  
19  
20  
21  
22  
23  
24  
25  
26  
27  
28  
29  
30  
31  
32  
33  
34  
35  
36  
37

### **Antibodies**

$\alpha$ -PCNA (P8825) and  $\alpha$ -HIS (H1029) were purchased from Sigma.  $\alpha$ -TRAIP (NBP1-87125) and  $\alpha$ -RNF213 (NBP1-88466) were purchased from Novus Biologicals.  $\alpha$ -SUMO2 and  $\alpha$ -SUMO1 were produced in the lab by culturing the hybridoma cell line SUMO2 (8A2) and SUMO1 (21C7) purchased from Developmental Studies Hybridoma Bank (hybridoma cell culture was done following manufacturer's instructions and adding 20 mM L-glutamine to the media). Affinity purified  $\alpha$ -Cdc45 (Gambus, Khoudoli et al., 2011),  $\alpha$ -Mcm3 (Khoudoli, Gillespie et al., 2008) and  $\alpha$ -LRR1 (S962D) (Sonneville et al., 2017) were previously described.  $\alpha$ -Mcm7 was raised in sheep against recombinant *Xenopus laevis* Mcm7, purified from *E.coli* and affinity purified in the lab.

### **DNA staining and microscopy**

Interphase *Xenopus laevis* egg extract was supplemented with 10 ng/ $\mu$ l of demembrated sperm nuclei and incubated at 23°C for 90 minutes to allow completion of DNA replication. Mitosis was optionally driven by addition of 826 nM cyclin A1 N $\Delta$ 56, and reactions were incubated for further 2 hours. Assembled S-phase or mitotic chromatin were stained with Hoechst 33258 and viewed as previously described (Strausfeld et al., 1996).

### **DNA synthesis assay (TCA)**

The replication reactions were started with the addition of demembrated *Xenopus* sperm DNA to 10 ng/ $\mu$ l as described before (Gillespie et al., 2012). The synthesis of nascent DNA was measured by quantification of  $\alpha$ 32P-dATP incorporation into newly synthesized DNA as described before (Gillespie et al., 2012).

### **Chromatin isolation time-course**

Interphase *Xenopus laevis* egg extract was supplemented with 10 ng/ $\mu$ l of demembrated sperm DNA and subjected to indicated treatments. The reaction was incubated at 23°C for 90 minutes to allow completion of DNA replication, after which mitosis was driven by addition of 826 nM cyclin A1 N $\Delta$ 56. The extract was optionally supplemented with inhibitors or recombinant proteins along with cyclin A1 N $\Delta$ 56 as indicated. Mitotic chromatin was isolated in ANIB100 buffer supplemented with 10 mM 2-chloroacetamide (Millipore) and 5 mM N-ethylmaleimide (NEM) (Acros Organics) at indicated time-points after addition of cyclin A1 N $\Delta$ 56 as previously described (Gillespie et al., 2012).

### **Immunoprecipitation of post-termination CMG associated with mitotic chromatin**

1 3.75 ml of interphase *Xenopus laevis* egg extract was supplemented with 10 ng/μl of  
2 demembrated sperm nuclei, 5 mM caffeine and 50 μM p97 inhibitor NMS873. The  
3 reaction was incubated at 23°C for 90 minutes to allow completion of DNA replication, after  
4 which mitosis was driven by addition of recombinant cyclin A1 NΔ56 at 826 nM followed by  
5 incubation at 23°C for further 60 minutes. At this stage, chromatin was isolated in ANIB100  
6 buffer supplemented with 10 mM 2-chloroacetamide as previously described (Gambus et al.,  
7 2011) and chromatin bound protein complexes released into solution by chromosomal DNA  
8 digestion with 2 U/μl benzonase for 15 minutes. Solubilisation of chromatin bound protein  
9 complexes was further facilitated by subjecting the sample to 5 minutes of 30 seconds  
10 ON/OFF sonication cycles using a diagenode bioruptor and increasing the concentration of  
11 potassium acetate up to 150 mM. The resulting protein complexes were subsequently  
12 subjected to either non-specific IgG (from sheep serum) or Mcm3 immunoprecipitation and  
13 the immunoprecipitated material analysed by mass spectrometry as previously described  
14 (Sonneville et al., 2017) in collaboration with Dr Richard Jones from MS Bioworks LLC.

15

## 16 **ACKNOWLEDGMENTS**

17 Dr Sara Priego Moreno was funded by Wellcome Trust ISS Award, Dr Rebecca Jones  
18 and Dr Agnieszka Gambus were funded by MRC CDA MR/K007106/1. We would like to  
19 thank Prof Ron Hay for pET28a-pHISTEV30a-SEN1(415-649) and Prof Julian Blow for  
20 pET23a-X.l. cyclin A1 NΔ56.

21

## 22 **FIGURE LEGENDS**

23

24 **Figure 1. Mcm7 is ubiquitylated with K6 and K63 ubiquitin chains in mitosis and removed**

25 **from chromatin by p97 segregase. (A)** Experimental design for driving egg extract into  
26 mitosis. **(B)** Experiment following design in (A). DNA was replicated to completion in egg  
27 extract supplemented with Cullin inhibitor MLN4924. After 90 min of replication reaction  
28 Cyclin A1Δ was optionally added to the extract to drive extract to mitosis. Chromatin was  
29 isolated at indicated time-points after Cyclin A1Δ addition and chromatin samples analysed  
30 by western blotting with indicated antibodies. Colloidal Coomassie stained histones serve as  
31 a quality and loading control. **(C)** The replication reaction was completed in the presence of  
32 Cullin inhibitor MLN4924 and driven into mitosis by addition of Cyclin A1Δ. At the same time  
33 as Cyclin A1Δ, half of the sample was supplemented additionally with p97 inhibitor NMS873.  
34 Chromatin samples were isolated at indicated time-points and analysed as in (B). A sample  
35 without DNA addition (no DNA) was processed alongside others as a chromatin specificity  
36 control. **(D)** The replication reaction was completed in the presence of p97 inhibitor NMS873

1 and driven into mitosis by addition of Cyclin A1 $\Delta$ . At the same time as Cyclin A1 $\Delta$ , samples  
2 were supplemented with recombinant wt ubiquitin or UbiNOK. Chromatin samples were  
3 analysed as above. **(E)** Experiment as in (D) but replication reaction was carried out in the  
4 presence of Cullin inhibitor MLN4924 instead of p97 inhibitor. **(G)** and **(H)** Replication  
5 reaction was completed in the presence of Cullin inhibitor MLN4924 and driven to mitosis by  
6 addition of Cyclin A1 $\Delta$ . At the same time as Cyclin A1 $\Delta$  addition, extract was supplemented  
7 with indicated mutants of ubiquitin. Chromatin was isolated at 75 minutes after Cyclin A1 $\Delta$   
8 addition and analysed by western blotting as above.

9

10 **Figure 2. Composition of the replisome retained on mitotic chromatin.** **(A)** Replication  
11 reaction was completed in egg extract supplemented with caffeine and p97 inhibitor  
12 NMS873, extract was driven into mitosis by addition of Cyclin A1 $\Delta$ , chromatin isolated at 60  
13 minutes after Cyclin A1 $\Delta$  addition and chromatin proteins released from DNA. Antibodies  
14 against Mcm3 (or control IgG) were used to immunoprecipitate replisomes and  
15 immunoprecipitated samples were analysed by mass spectrometry. The total spectral count  
16 for each identified replisome component is presented together with sequence coverage of  
17 analysed peptides. The result of analysis of mitotic retained replisome is compared with S-  
18 phase post-replication replisome reported in (Sonneville et al., 2017). **(B)** Schematic  
19 representation of the data presented in (A). **(C)** A small proportion of the material from the  
20 mitotic Mcm3 IP experiment in (A) was analysed by western blotting with indicated  
21 antibodies.

22

23 **Figure 3. TRAIP regulates replisome disassembly in mitosis.** **(A)** Sperm DNA was  
24 replicated in egg extract optionally supplemented with p97 inhibitor NMS873. Chromatin  
25 samples were isolated during reaction at indicated time-points and analysed as in Fig 1. **(B)**  
26 Experiment analogous to Fig 1C but analysed with indicated antibodies. **(C)** The replication  
27 reaction was completed in the presence of Cullin inhibitor MLN4924 and driven into mitosis  
28 by addition of Cyclin A1 $\Delta$ . At the same time as Cyclin A1 $\Delta$ , most of the samples were  
29 supplemented with p97 inhibitor NMS873 and optionally with LFB1/50 buffer or wt TRAIP or  
30 RING mutant (C25A) TRAIP at 30  $\mu$ g/ml. Chromatin samples were isolated at indicated time-  
31 points and analysed with indicated antibodies. The dashed line on Mcm7 blot runs through  
32 the middle of ubiquitylation signal for Mcm7 in mitosis in control (buffer) sample to aid  
33 comparison between samples.

34

35 **Figure 4. SUMOylation is not required for mitotic replisome disassembly.** **(A)** The  
36 replication reaction was completed in the presence of Cullin inhibitor MLN4924 and driven

1 into mitosis by addition of Cyclin A1 $\Delta$ . At the same time as Cyclin A1 $\Delta$ , half of the sample  
2 was supplemented additionally with active domain of SENP1. Chromatin samples were  
3 isolated at indicated time-points and analysed as in Fig 1. **(B)** As in (A) but instead of  
4 supplementing extract with SENP1 we supplemented it with SENPs inhibitor SUMO2-VS.  
5

6 **Figure 5. Mitotic unloading of active helicases.** **(A)** The replication reaction was  
7 performed in egg extract supplemented with DNA polymerase inhibitor aphidicolin and  
8 checkpoint inhibitor caffeine. After 90 min of reaction, Cyclin A1 $\Delta$  was optionally added and  
9 chromatin samples isolated at indicated time-points and analysed by western blotting with  
10 indicated antibodies (analogously to Fig 1B). **(B)** The inhibition of stalled replisomes was  
11 achieved as in (A) and extract was driven into mitosis with optional supplementation with  
12 p97 inhibitor NMS873. Chromatin samples were analysed as in (A).  
13

14 **EV Figure 1. Setting up mitotic replisome disassembly.** **(A)** Progression of replication  
15 reaction was measured by incorporation of radioactive dATP into the DNA. P<sup>32</sup> $\alpha$ -dATP was  
16 added to the extract at the beginning of the reaction (S-phase) or after 90 min of replication  
17 reaction together with optional addition of Cyclin A1 $\Delta$  (buffer control or Cyclin A1 $\Delta$ ). **(B)** The  
18 replication reaction was completed and optionally driven into mitosis by addition of Cyclin  
19 A1 $\Delta$ . The nuclei assembled in the extract were visualised by Hoechst 33258 staining. **(C)**  
20 Experiment as in Fig 1C but indicated inhibitors were present in the reaction throughout both  
21 stages of the cell cycle.  
22

23 **EV Figure 2. Mitotic replisome disassembly is not affected by stimulation of**  
24 **SUMOylation.** The replication reaction was completed in the presence of Cullin inhibitor  
25 MLN4924 and driven into mitosis by addition of Cyclin A1 $\Delta$ . At the same time as Cyclin A1 $\Delta$ ,  
26 extract was optionally supplemented with buffer control, SUMO1 or SUMO2. Chromatin  
27 samples were isolated at indicated time-points and analysed as in Fig 1.  
28

29 **EV Figure 3. S-phase replisome disassembly is not affected by SUMOylation.** **(A)** The  
30 replication reaction was performed in egg extract supplemented with dominant negative  
31 mutant of Ubc9 (Ubc9DN) or active domain of SENP1. Chromatin samples were isolated at  
32 indicated time-points and analysed by western blotting with indicated antibodies. **(B)** The  
33 replication reaction was performed in egg extract supplemented with 0.5 mg/ml of SUMO1 or  
34 SUMO2 (as indicated). Chromatin samples were isolated at indicated time-points and  
35 analysed by western blotting with indicated antibodies. Controls as in Fig 1.  
36



## 1 REFERENCES

- 2 Alexandru G, Graumann J, Smith GT, Kolawa NJ, Fang R, Deshaies RJ (2008) UBXD7  
3 binds multiple ubiquitin ligases and implicates p97 in HIF1alpha turnover. *Cell* 134: 804-16
- 4 Almeida S, Ryser S, Obarzanek-Fojt M, Hohl D, Huber M (2011) The TRAF-interacting  
5 protein (TRIP) is a regulator of keratinocyte proliferation. *J Invest Dermatol* 131: 349-57
- 6 Banh RS, Iorio C, Marcotte R, Xu Y, Cojocari D, Rahman AA, Pawling J, Zhang W, Sinha  
7 A, Rose CM, Isasa M, Zhang S, Wu R, Virtanen C, Hitomi T, Habu T, Sidhu SS, Koizumi A,  
8 Wilkins SE, Kislinger T et al. (2016) PTP1B controls non-mitochondrial oxygen  
9 consumption by regulating RNF213 to promote tumour survival during hypoxia. *Nat Cell*  
10 *Biol* 18: 803-813
- 11 Besse A, Campos AD, Webster WK, Darnay BG (2007) TRAF-interacting protein (TRIP) is  
12 a RING-dependent ubiquitin ligase. *Biochem Biophys Res Commun* 359: 660-4
- 13 Bhowmick R, Hickson ID (2017) The "enemies within": regions of the genome that are  
14 inherently difficult to replicate. *F1000Res* 6: 666
- 15 Burrell RA, McClelland SE, Endesfelder D, Groth P, Weller MC, Shaikh N, Domingo E,  
16 Kanu N, Dewhurst SM, Gronroos E, Chew SK, Rowan AJ, Schenk A, Sheffer M, Howell M,  
17 Kschischo M, Behrens A, Helleday T, Bartek J, Tomlinson IP et al. (2013) Replication stress  
18 links structural and numerical cancer chromosomal instability. *Nature* 494: 492-6
- 19 Chapard C, Hohl D, Huber M (2015) The TRAF-interacting protein (TRAIP) is a novel E2F  
20 target with peak expression in mitosis. *Oncotarget* 6: 20933-45
- 21 Chapard C, Meraldi P, Gleich T, Bachmann D, Hohl D, Huber M (2014) TRAIP is a  
22 regulator of the spindle assembly checkpoint. *J Cell Sci* 127: 5149-56
- 23 Dewar JM, Budzowska M, Walter JC (2015) The mechanism of DNA replication termination  
24 in vertebrates. *Nature* 525: 345-50
- 25 Feng W, Guo Y, Huang J, Deng Y, Zang J, Huen MS (2016) TRAIP regulates replication  
26 fork recovery and progression via PCNA. *Cell Discov* 2: 16016
- 27 Fu YV, Yardimci H, Long DT, Ho TV, Guainazzi A, Bermudez VP, Hurwitz J, van Oijen A,  
28 Scharer OD, Walter JC (2011) Selective bypass of a lagging strand roadblock by the  
29 eukaryotic replicative DNA helicase. *Cell* 146: 931-41
- 30 Gambus A, Jones RC, Sanchez-Diaz A, Kanemaki M, van Deursen F, Edmondson RD, Labib  
31 K (2006) GINS maintains association of Cdc45 with MCM in replisome progression  
32 complexes at eukaryotic DNA replication forks. *Nat Cell Biol* 8: 358-66
- 33 Gambus A, Khoudoli GA, Jones RC, Blow JJ (2011) MCM2-7 form double hexamers at  
34 licensed origins in *Xenopus* egg extract. *The Journal of biological chemistry* 286: 11855-64
- 35 Gillespie PJ, Gambus A, Blow JJ (2012) Preparation and use of *Xenopus* egg extracts to  
36 study DNA replication and chromatin associated proteins. *Methods* 57: 203-13
- 37 Hao Q, Jiao S, Shi Z, Li C, Meng X, Zhang Z, Wang Y, Song X, Wang W, Zhang R, Zhao Y,  
38 Wong CC, Zhou Z (2015) A non-canonical role of the p97 complex in RIG-I antiviral  
39 signaling. *EMBO J* 34: 2903-20
- 40 Harley ME, Murina O, Leitch A, Higgs MR, Bicknell LS, Yigit G, Blackford AN, Zlatanou  
41 A, Mackenzie KJ, Reddy K, Halachev M, McGlasson S, Reijns MAM, Fluteau A, Martin  
42 CA, Sabbioneda S, Elcioglu NH, Altmuller J, Thiele H, Greenhalgh L et al. (2016) TRAIP  
43 promotes DNA damage response during genome replication and is mutated in primordial  
44 dwarfism. *Nat Genet* 48: 36-43
- 45 Heidelberg JB, Voigt A, Borisova ME, Petrosino G, Ruf S, Wagner SA, Beli P (2018)  
46 Proteomic profiling of VCP substrates links VCP to K6-linked ubiquitylation and c-Myc  
47 function. *EMBO Rep* 19
- 48 Hoffmann S, Smedegaard S, Nakamura K, Mortuza GB, Raschle M, Ibanez de Opakua A,  
49 Oka Y, Feng Y, Blanco FJ, Mann M, Montoya G, Groth A, Bekker-Jensen S, Mailand N

- 1 (2016) TRAIIP is a PCNA-binding ubiquitin ligase that protects genome stability after  
2 replication stress. *J Cell Biol* 212: 63-75
- 3 Kamada F, Aoki Y, Narisawa A, Abe Y, Komatsuzaki S, Kikuchi A, Kanno J, Niihori T, Ono  
4 M, Ishii N, Owada Y, Fujimura M, Mashimo Y, Suzuki Y, Hata A, Tsuchiya S, Tominaga T,  
5 Matsubara Y, Kure S (2011) A genome-wide association study identifies RNF213 as the first  
6 Moyamoya disease gene. *J Hum Genet* 56: 34-40
- 7 Kato K, Nakajima K, Ui A, Muto-Terao Y, Ogiwara H, Nakada S (2014) Fine-tuning of  
8 DNA damage-dependent ubiquitination by OTUB2 supports the DNA repair pathway choice.  
9 *Mol Cell* 53: 617-30
- 10 Khoudoli GA, Gillespie PJ, Stewart G, Andersen JS, Swedlow JR, Blow JJ (2008) Temporal  
11 profiling of the chromatin proteome reveals system-wide responses to replication inhibition.  
12 *Current biology* : CB 18: 838-43
- 13 Kobayashi H, Yamazaki S, Takashima S, Liu W, Okuda H, Yan J, Fujii Y, Hitomi T, Harada  
14 KH, Habu T, Koizumi A (2013) Ablation of Rnf213 retards progression of diabetes in the  
15 Akita mouse. *Biochem Biophys Res Commun* 432: 519-25
- 16 Lee SY, Lee SY, Choi Y (1997) TRAF-interacting protein (TRIP): a novel component of the  
17 tumor necrosis factor receptor (TNFR)- and CD30-TRAF signaling complexes that inhibits  
18 TRAF2-mediated NF-kappaB activation. *J Exp Med* 185: 1275-85
- 19 Liu W, Morito D, Takashima S, Mineharu Y, Kobayashi H, Hitomi T, Hashikata H, Matsuura  
20 N, Yamazaki S, Toyoda A, Kikuta K, Takagi Y, Harada KH, Fujiyama A, Herzig R,  
21 Krischek B, Zou L, Kim JE, Kitakaze M, Miyamoto S et al. (2011) Identification of RNF213  
22 as a susceptibility gene for moyamoya disease and its possible role in vascular development.  
23 *PLoS One* 6: e22542
- 24 Liu Y, Nielsen CF, Yao Q, Hickson ID (2014) The origins and processing of ultra fine  
25 anaphase DNA bridges. *Curr Opin Genet Dev* 26: 1-5
- 26 Maric M, Maculins T, De Piccoli G, Labib K (2014) Cdc48 and a ubiquitin ligase drive  
27 disassembly of the CMG helicase at the end of DNA replication. *Science* 346: 1253-56
- 28 Maric M, Mukherjee P, Tatham MH, Hay R, Labib K (2017) Ufd1-Npl4 Recruit Cdc48 for  
29 Disassembly of Ubiquitylated CMG Helicase at the End of Chromosome Replication. *Cell*  
30 *Rep* 18: 3033-3042
- 31 Meyer H (2012) p97 complexes as signal integration hubs. *BMC Biol* 10: 48
- 32 Meyer H, Bug M, Bremer S (2012) Emerging functions of the VCP/p97 AAA-ATPase in the  
33 ubiquitin system. *Nature cell biology* 14: 117-23
- 34 Meyer HJ, Rape M (2014) Enhanced protein degradation by branched ubiquitin chains. *Cell*  
35 157: 910-21
- 36 Minocherhomji S, Ying S, Bjerregaard VA, Bursomanno S, Aleliunaite A, Wu W, Mankouri  
37 HW, Shen H, Liu Y, Hickson ID (2015) Replication stress activates DNA repair synthesis in  
38 mitosis. *Nature* 528: 286-90
- 39 Moreno A, Carrington JT, Albergante L, Al Mamun M, Haagensen EJ, Komseli ES,  
40 Gorgoulis VG, Newman TJ, Blow JJ (2016) Unreplicated DNA remaining from unperturbed  
41 S phases passes through mitosis for resolution in daughter cells. *Proceedings of the National*  
42 *Academy of Sciences of the United States of America* 113: E5757-64
- 43 Moreno SP, Bailey R, Campion N, Herron S, Gambus A (2014) Polyubiquitylation drives  
44 replisome disassembly at the termination of DNA replication. *Science* 346: 477-81
- 45 Moyer SE, Lewis PW, Botchan MR (2006) Isolation of the Cdc45/Mcm2-7/GINS (CMG)  
46 complex, a candidate for the eukaryotic DNA replication fork helicase. *Proceedings of the*  
47 *National Academy of Sciences of the United States of America* 103: 10236-41
- 48 Mukherjee R, Chakrabarti O (2016) Regulation of Mitofusin1 by Mahogunin Ring Finger-1  
49 and the proteasome modulates mitochondrial fusion. *Biochim Biophys Acta* 1863: 3065-3083

- 1 Park ES, Choi S, Kim JM, Jeong Y, Choe J, Park CS, Choi Y, Rho J (2007) Early embryonic  
2 lethality caused by targeted disruption of the TRAF-interacting protein (TRIP) gene.  
3 *Biochem Biophys Res Commun* 363: 971-7
- 4 Park IS, Han Y, Chung HJ, Jung YW, Kim Y, Kim H (2016) SUMOylation regulates nuclear  
5 localization and stability of TRAIIP/RNF206. *Biochem Biophys Res Commun* 470: 881-7
- 6 Park IS, Jo KS, Won HS, Kim H (2015) Dimerization of TRAF-interacting protein (TRAIIP)  
7 regulates the mitotic progression. *Biochem Biophys Res Commun* 463: 864-9
- 8 Sonnevile R, Moreno SP, Knebel A, Johnson C, Hastie CJ, Gartner A, Gambus A, Labib K  
9 (2017) CUL-2LRR-1 and UBXN-3 drive replisome disassembly during DNA replication  
10 termination and mitosis. *Nat Cell Biol*
- 11 Sonobe S, Fujimura M, Niizuma K, Nishijima Y, Ito A, Shimizu H, Kikuchi A, Arai-Ichinoi  
12 N, Kure S, Tominaga T (2014) Temporal profile of the vascular anatomy evaluated by 9.4-T  
13 magnetic resonance angiography and histopathological analysis in mice lacking RNF213: a  
14 susceptibility gene for moyamoya disease. *Brain Res* 1552: 64-71
- 15 Soo Lee N, Jin Chung H, Kim HJ, Yun Lee S, Ji JH, Seo Y, Hun Han S, Choi M, Yun M,  
16 Lee SG, Myung K, Kim Y, Chul Kang H, Kim H (2016) TRAIIP/RNF206 is required for  
17 recruitment of RAP80 to sites of DNA damage. *Nat Commun* 7: 10463
- 18 Strausfeld UP, Howell M, Descombes P, Chevalier S, Rempel RE, Adamczewski J, Maller  
19 JL, Hunt T, Blow JJ (1996) Both cyclin A and cyclin E have S-phase promoting (SPF)  
20 activity in *Xenopus* egg extracts. *J Cell Sci* 109 ( Pt 6): 1555-63
- 21 Wallace HA, Merkle JA, Yu MC, Berg TG, Lee E, Bosco G, Lee LA (2014) TRIP/NOPO E3  
22 ubiquitin ligase promotes ubiquitylation of DNA polymerase  $\epsilon$ . *Development* 141: 1332-41
- 23 Windheim M, Peggie M, Cohen P (2008) Two different classes of E2 ubiquitin-conjugating  
24 enzymes are required for the mono-ubiquitination of proteins and elongation by polyubiquitin  
25 chains with a specific topology. *Biochem J* 409: 723-9
- 26 Yang C, Trent S, Ionescu-Tiba V, Lan L, Shioda T, Sgroi D, Schmidt EV (2006)  
27 Identification of cyclin D1- and estrogen-regulated genes contributing to breast  
28 carcinogenesis and progression. *Cancer Res* 66: 11649-58
- 29 Zhou Q, Geahlen RL (2009) The protein-tyrosine kinase Syk interacts with TRAF-interacting  
30 protein TRIP in breast epithelial cells. *Oncogene* 28: 1348-56

31

Priego Moreno et al. Fig 1

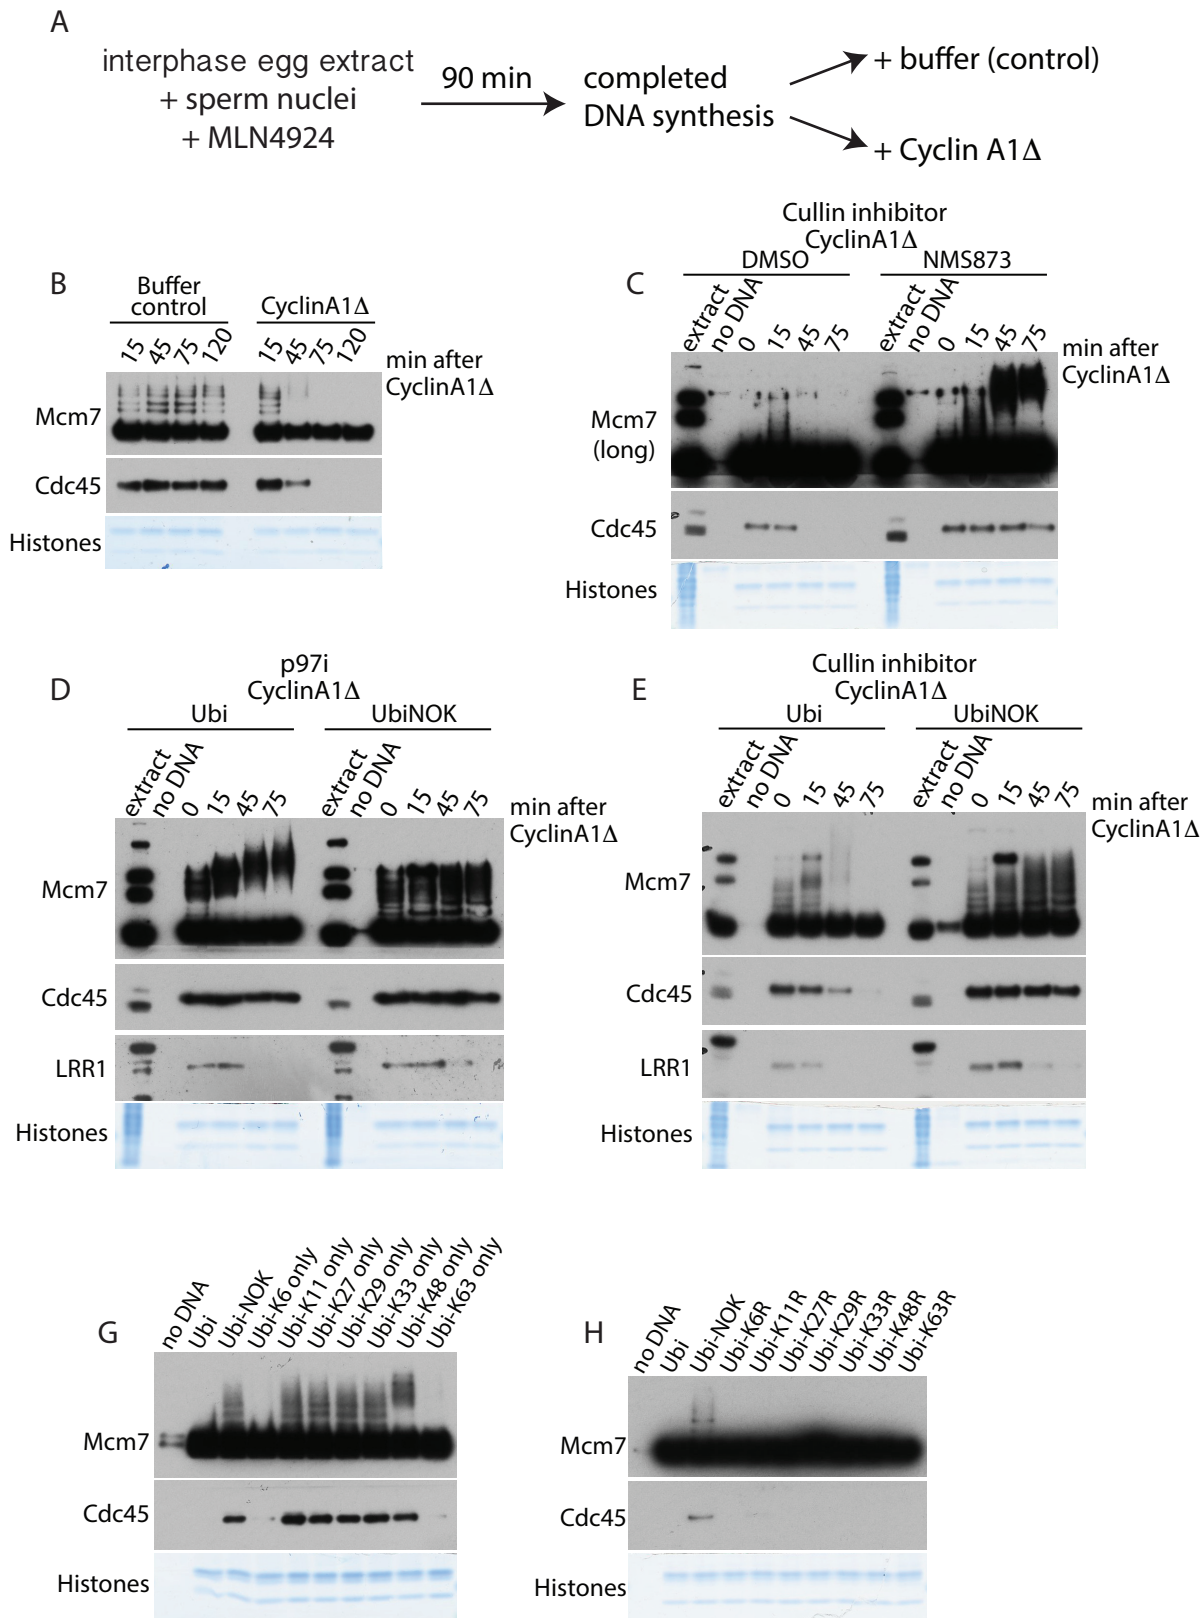

**A**

|                                 | Protein (kDa)        | IP from mitotic chromatin with retained CMG (extract treated with p971) |                | IP from S-phase post-termination chromatin with retained replisome (Sonneville et al 2017) |                |
|---------------------------------|----------------------|-------------------------------------------------------------------------|----------------|--------------------------------------------------------------------------------------------|----------------|
|                                 |                      | IgG                                                                     | $\alpha$ -Mcm3 | IgG                                                                                        | $\alpha$ -Mcm3 |
|                                 |                      | TSC (coverage)                                                          | TSC (coverage) | TSC (coverage)                                                                             | TSC (coverage) |
| CMG complex (Mcm2-7/Cdc45/GINS) | Mcm2 (100)           | 364 (46%)                                                               | 1348 (78%)     | 17 (17%)                                                                                   | 975 (71%)      |
|                                 | Mcm3 (90)            | 222 (55%)                                                               | 1610 (90%)     | 17 (20%)                                                                                   | 1111 (84%)     |
|                                 | Mcm4 (97)            | 198 (45%)                                                               | 1277 (85%)     | 7 (7.4%)                                                                                   | 947 (75%)      |
|                                 | Mcm5 (82)            | 70 (59%)                                                                | 720 (88%)      | 30 (17%)                                                                                   | 927 (83%)      |
|                                 | Mcm6 (93)            | 196 (60%)                                                               | 964 (91%)      | 39 (14%)                                                                                   | 888 (83%)      |
|                                 | Mcm7 (82)            | 160 (52%)                                                               | 1082 (84%)     | 24 (8.9%)                                                                                  | 905 (73%)      |
|                                 | Cdc45 (66)           | 18 (26%)                                                                | 187 (46%)      | 2 (2.6%)                                                                                   | 277 (54%)      |
|                                 | Psf1 (23)            | 3 (31%)                                                                 | 58 (90%)       | 0                                                                                          | 62 (85%)       |
|                                 | Psf2 (21)            | 0                                                                       | 26 (58%)       | 0                                                                                          | 33 (79%)       |
|                                 | Psf3 (24)            | 3 (15%)                                                                 | 55 (79%)       | 0                                                                                          | 55 (92%)       |
| Sld5 (26)                       | 2 (10%)              | 42 (81%)                                                                | 0              | 44 (64%)                                                                                   |                |
| Replisome components            | Spt16 (118)          | 109 (23%)                                                               | 431 (61%)      | 3 (2.9%)                                                                                   | 453 (52%)      |
|                                 | Ssrp1 (79)           | 19 (8%)                                                                 | 224 (45%)      | 0                                                                                          | 229 (48%)      |
|                                 | Ctf4 (97)            | 4 (4%)                                                                  | 82 (31%)       | 0                                                                                          | 166 (49%)      |
|                                 | Timeless (149)       | 6 (3%)                                                                  | 112 (39%)      | 0                                                                                          | 171 (29%)      |
|                                 | Tipin (40)           | 0                                                                       | 20 (27%)       | 0                                                                                          | 54 (24%)       |
|                                 | Claspin (146)        | 0                                                                       | 0              | 0                                                                                          | 72 (21%)       |
|                                 | Mcm10 (95)           | 0                                                                       | 0              | 0                                                                                          | 257 (44%)      |
|                                 | Ctf18 (113)          | 0                                                                       | 0              | 0                                                                                          | 172 (36%)      |
|                                 | Ctf8 (14)            | 0                                                                       | 0              | 0                                                                                          | 8 (52%)        |
|                                 | Dcc1 (45)            | 0                                                                       | 0              | 0                                                                                          | 33 (38%)       |
|                                 | Rfc2 (38)            | 0                                                                       | 0              | 0                                                                                          | 27 (54%)       |
|                                 | Rfc3 (40)            | 0                                                                       | 0              | 4 (14%)                                                                                    | 36 (54%)       |
|                                 | Rfc4 (40)            | 0                                                                       | 0              | 2 (5.2%)                                                                                   | 31 (57%)       |
|                                 | Rfc5 (38)            | 0                                                                       | 0              | 0                                                                                          | 22 (56%)       |
|                                 | Pol $\alpha$ 1 (165) | 0                                                                       | 0              | 0                                                                                          | 109 (30%)      |
|                                 | Prim1 (49)           | 0                                                                       | 0              | 0                                                                                          | 14 (28%)       |
|                                 | Prim2 (61)           | 0                                                                       | 0              | 0                                                                                          | 24 (24%)       |
|                                 | Pole1 (261)          | 12 (5%)                                                                 | 166 (29%)      | 2 (0.88%)                                                                                  | 543 (38%)      |
|                                 | Pole2 (60)           | 0                                                                       | 15 (32%)       | 0                                                                                          | 103 (50%)      |
|                                 | Pole3 (17)           | 0                                                                       | 4 (27%)        | 0                                                                                          | 10 (45%)       |
| Pole4 (12)                      | 0                    | 0                                                                       | 0              | 4 (35%)                                                                                    |                |
| Rpa1 (67)                       | 80 (53%)             | 107 (48%)                                                               | 0              | 10 (12%)                                                                                   |                |
| Rpa2 (29)                       | 13 (22%)             | 30 (55%)                                                                | 0              | 2 (9%)                                                                                     |                |
| Rpa3 (13)                       | 6 (52%)              | 10 (92%)                                                                | 0              | 0                                                                                          |                |
| cullin2-LRR1                    | cullin2 (87)         | 6 (8%)                                                                  | 4 (3%)         | 0                                                                                          | 124 (52%)      |
|                                 | LRR1 (47)            | 0                                                                       | 11 (21%)       | 0                                                                                          | 46 (44%)       |
|                                 | Elongin B (13)       | 0                                                                       | 0              | 0                                                                                          | 5 (31%)        |
|                                 | Elongin C (12)       | 0                                                                       | 0              | 0                                                                                          | 7 (32%)        |
| ubi ligases                     | Traip (87)           | 2 (4%)                                                                  | 42 (44%)       | 0                                                                                          | 34 (36%)       |
|                                 | RNF213 (47)          | 0                                                                       | 17 (2%)        | 0                                                                                          | 0              |

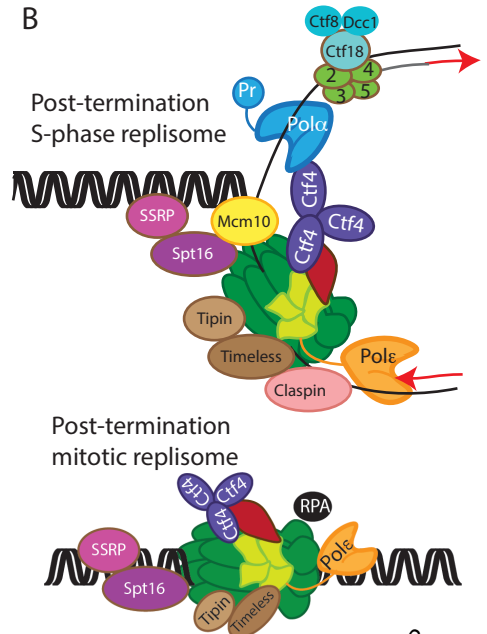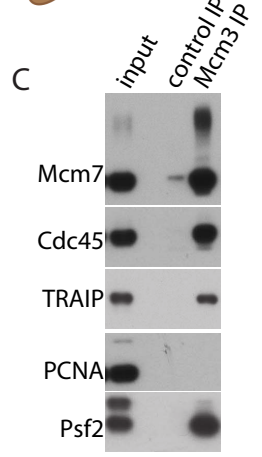



Priego Moreno et al. Fig 3

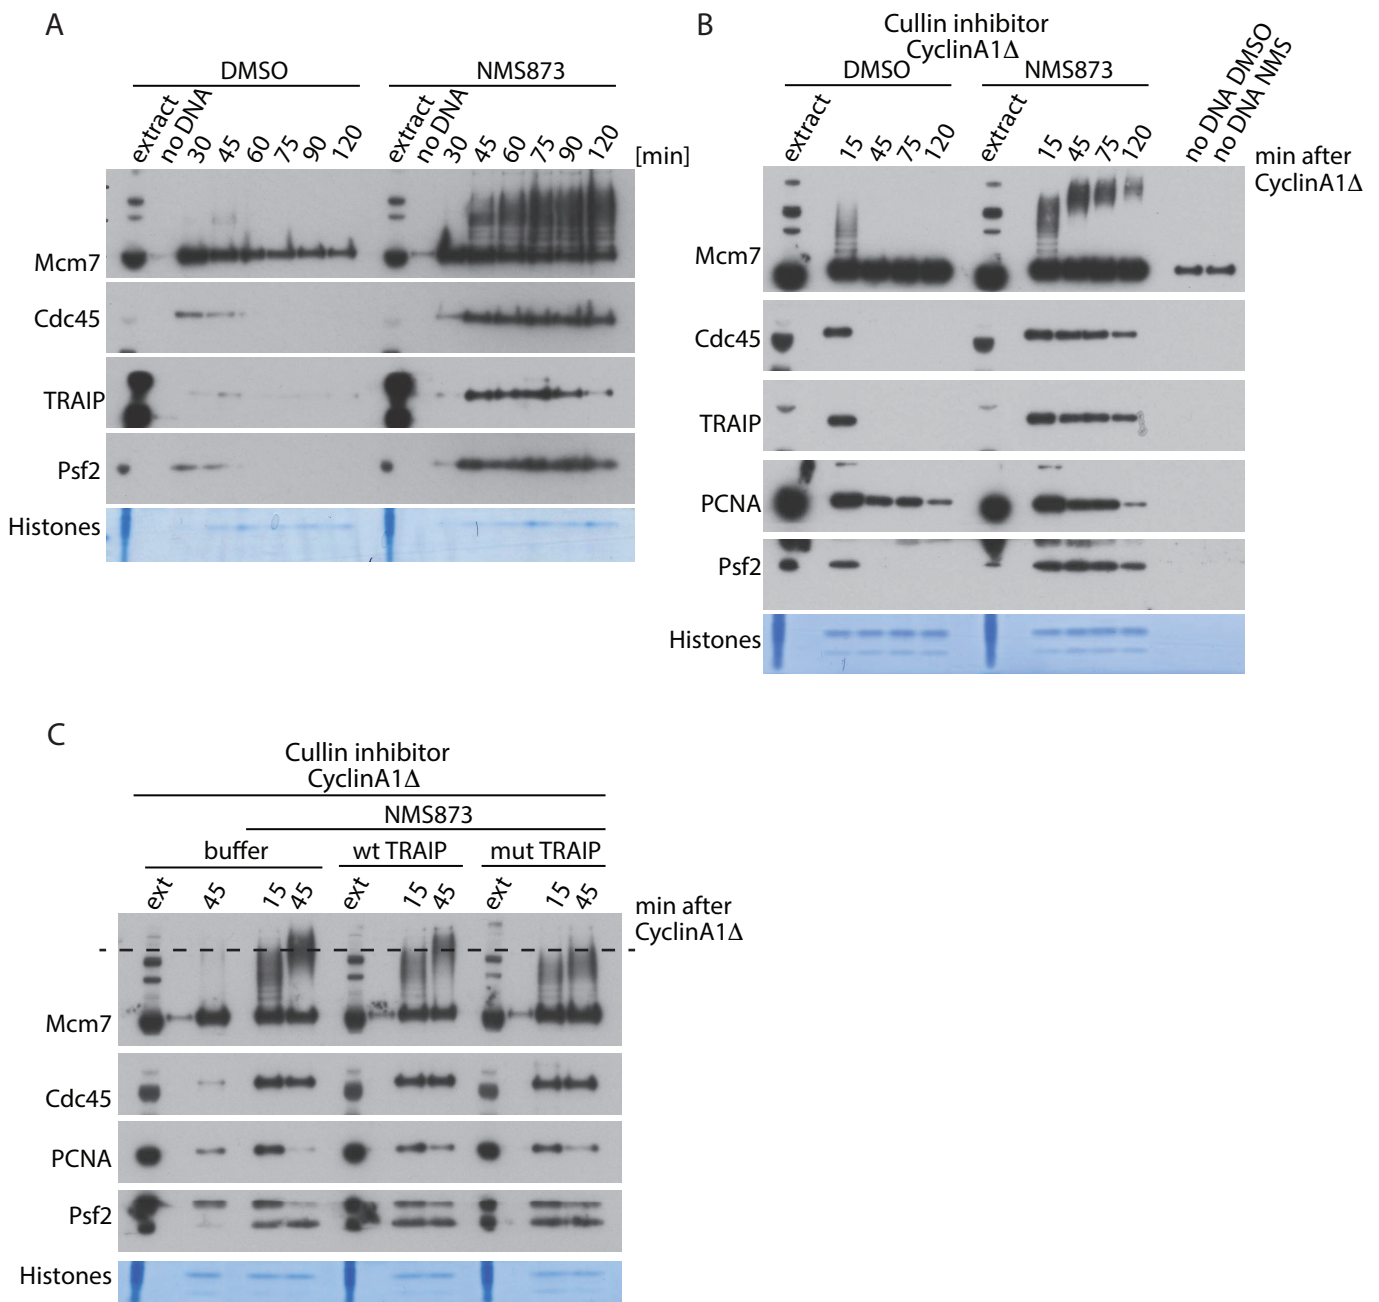



Priego Moreno et al. Fig 5

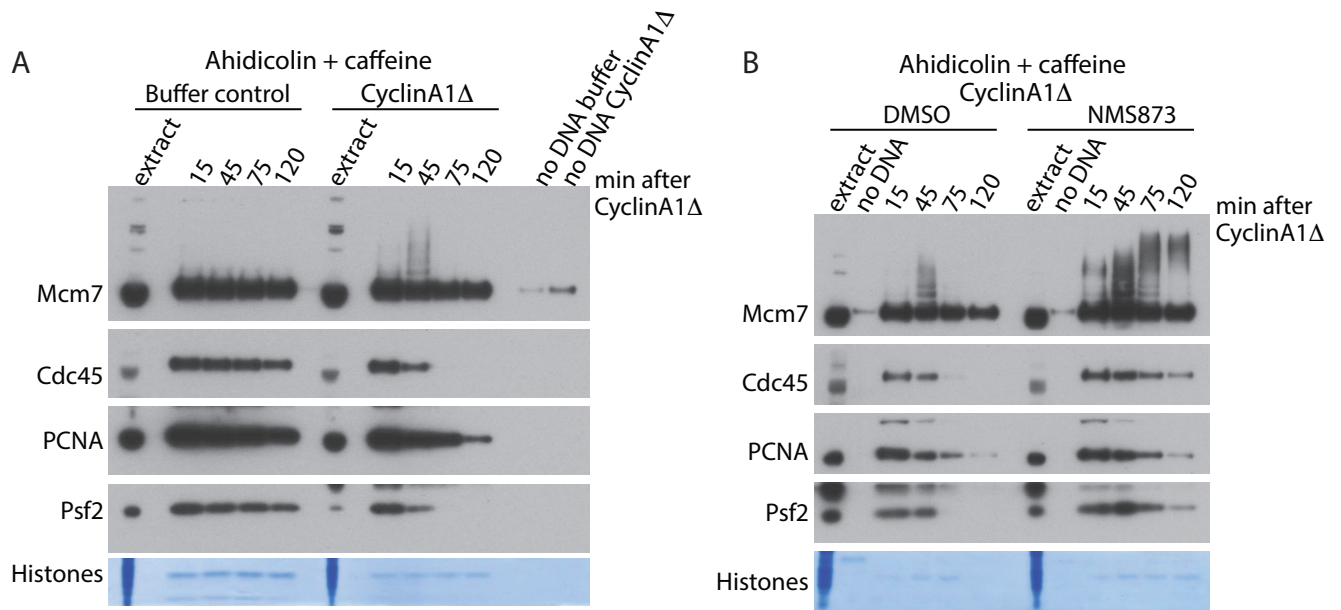

Priego Moreno et al. Fig 4

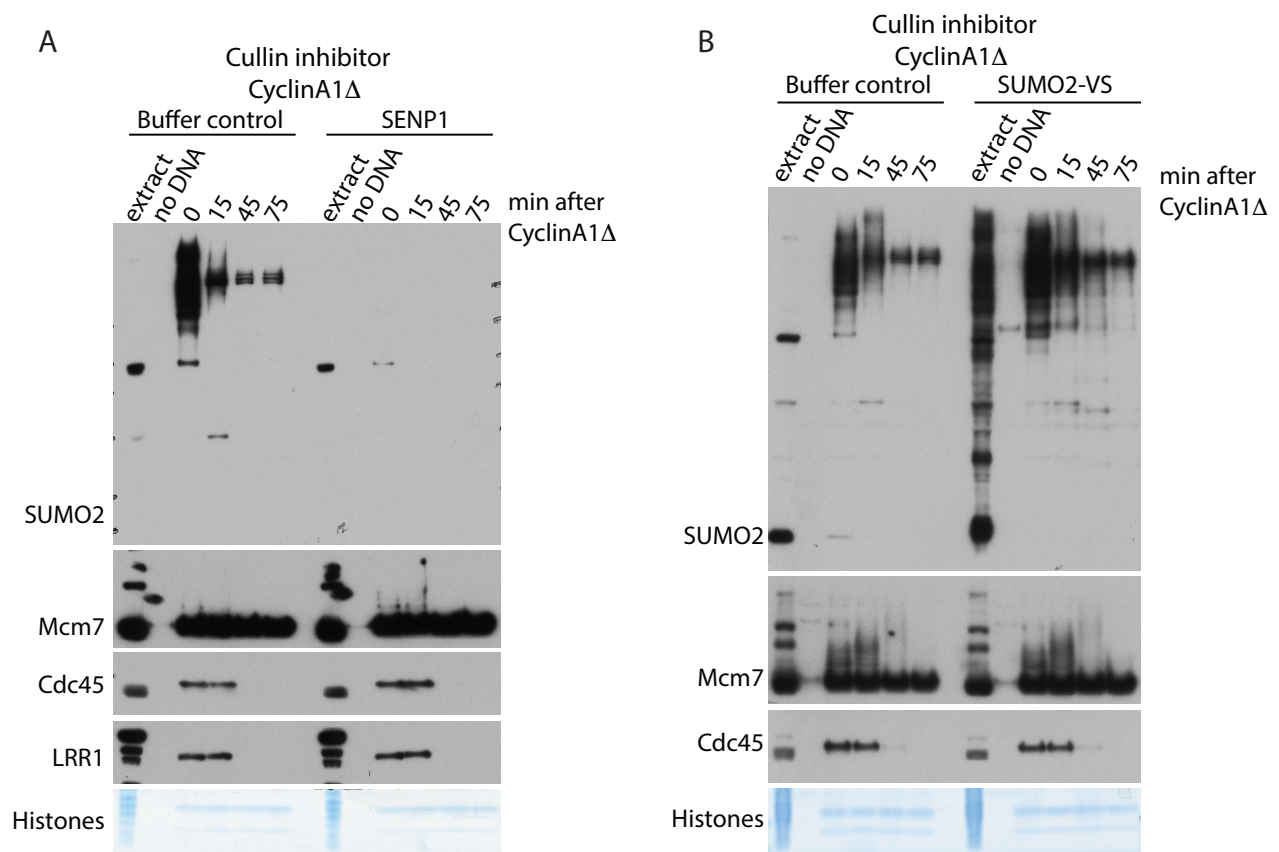

Priego Moreno et al. EV Fig 1

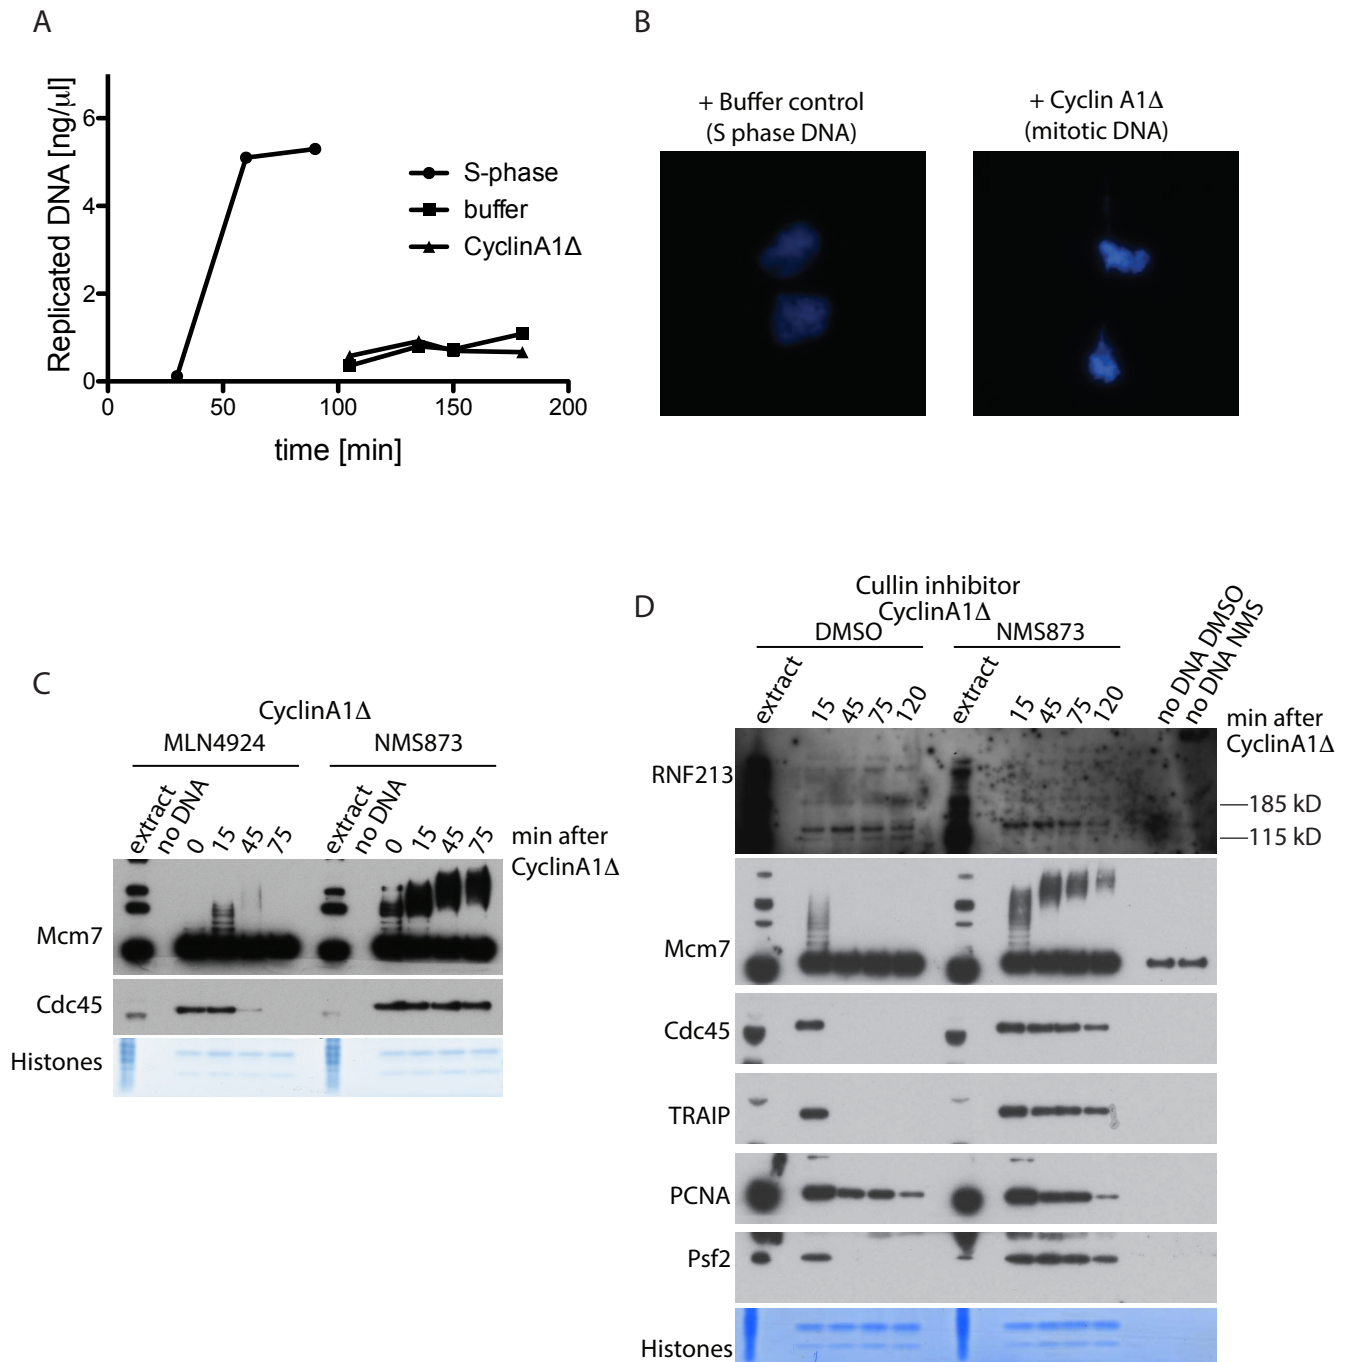

Priego Moreno et al. EV Fig 2

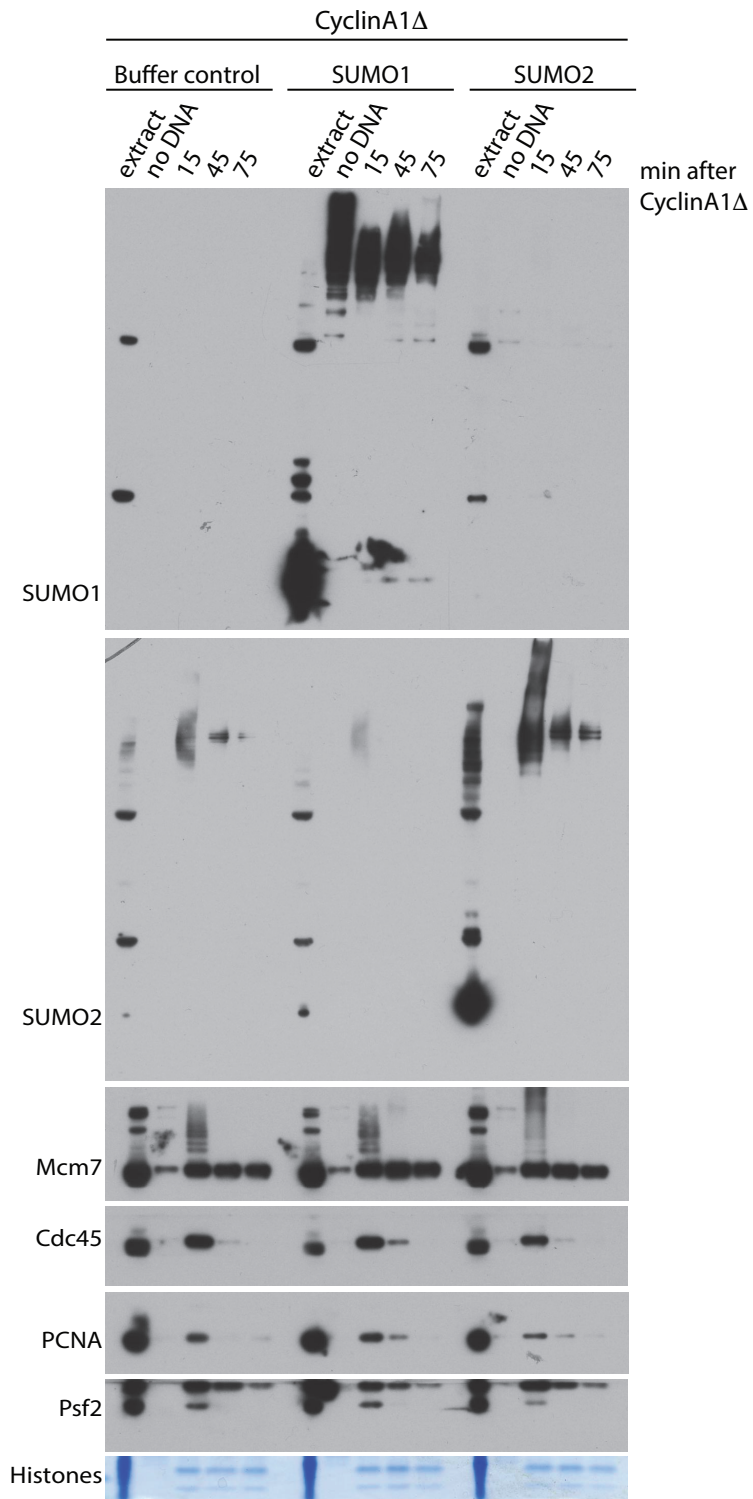

Priego Moreno et al. EV Fig 3

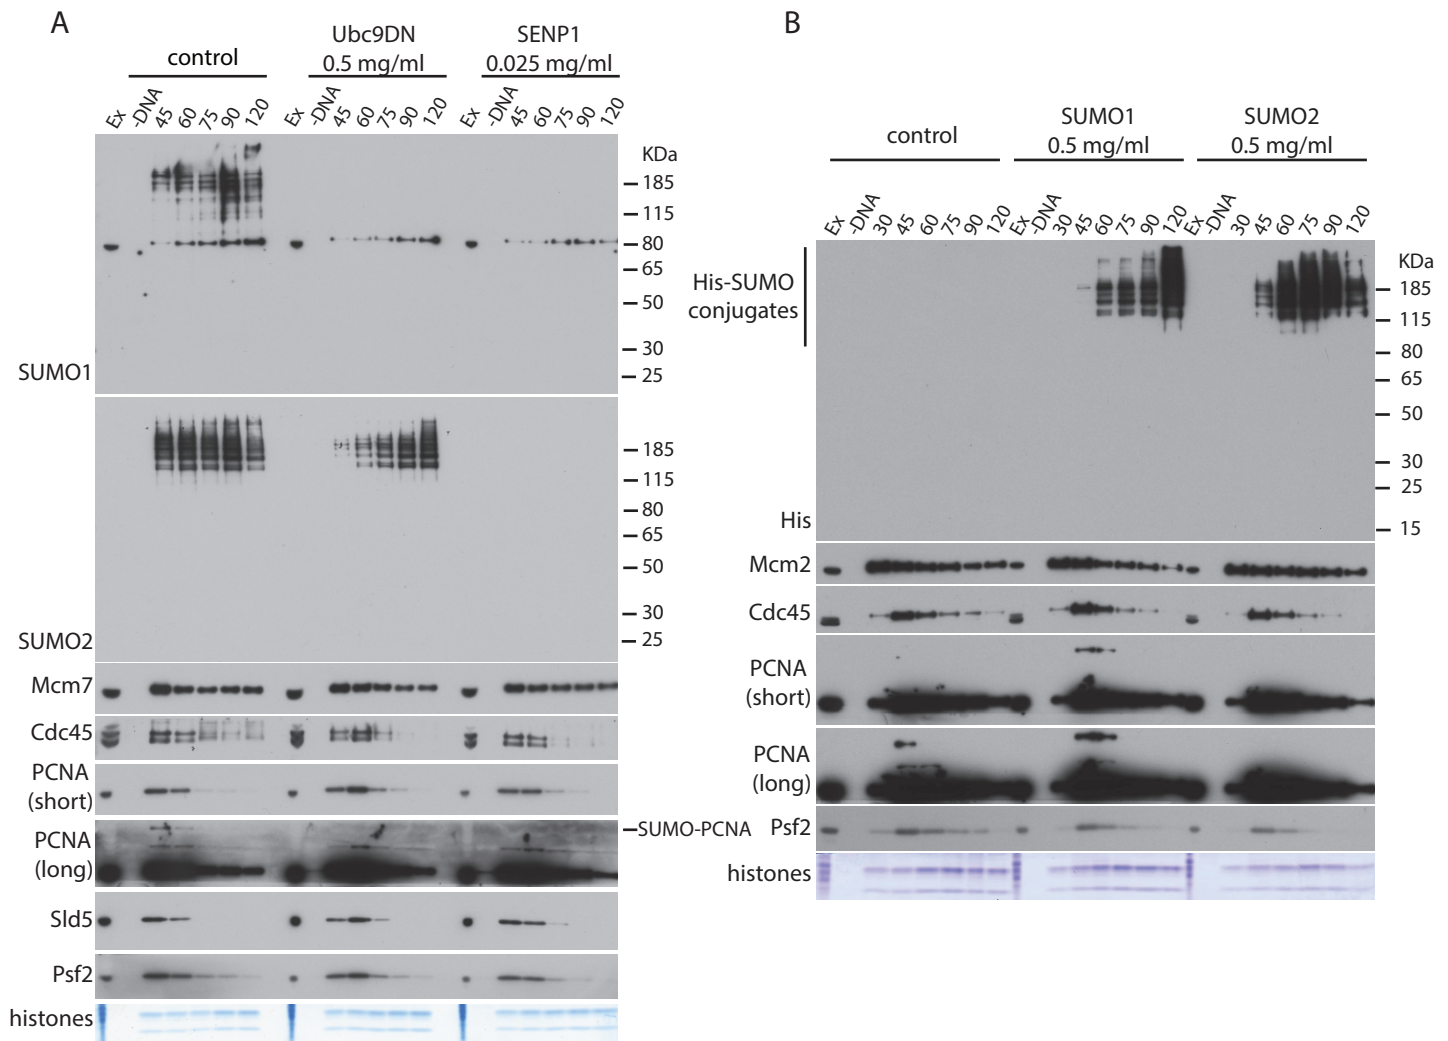

Source: https://www.biorxiv.org/content/biorxiv/early/2018/09/15/418368.full.pdf
